# Supplementary material for: A Glycolysis-Based Long Non-coding RNA Signature Accurately Predicts Prognosis in Renal Carcinoma Patients
Source: Front Genet. 2021 Apr 1;12:638980. doi: 10.3389/fgene.2021.638980 (PMC8047215; doi:10.3389/fgene.2021.638980)
Supplement: Supplementary file 3 [file Table_3.xls]

## Sheet: multiCox
id	HR	HR.95L	HR.95H	pvalue
age	1.0371	1.02185	1.05257	1.42e-06
gender	1.0048	0.718537	1.40511	0.977667
grade	1.4051	1.10418	1.78804	0.00567715
stage	1.75274	1.1151	2.75501	0.0150109
T	0.848726	0.561757	1.28229	0.435976
M	1.2024	0.607801	2.37868	0.596439
riskScore	1.14271	1.09898	1.18818	2.08e-11
